# Supplementary material for: Promising Nature-Based Solutions to Support Climate Adaptation of Arizona’s Local Food Entrepreneurs and Optimize One Health
Source: MDPI journal article supplement (doi:10.3390/su16083176), 2024-04-10
Supplement: s1 [file s1]

Archive with 1 entries (1 files):
- sustainability-2924766-supplementary.pdf
